# Supplementary material for: How economically and environmentally viable are multiple dams in the upper Cauvery Basin, India? A hydro-economic analysis using a landscape-based hydrological model
Source: Copernicus journal article supplement (doi:10.5194/hess-28-3219-2024), 2024-07-24
Supplement: Supplementary file 1 [file hess-28-3219-2024-supplement.pdf]

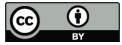

*Supplement of*

**How economically and environmentally viable are multiple dams in the upper Cauvery Basin, India? A hydro-economic analysis using a landscape-based hydrological model**

**Anjana Ekka et al.**

*Correspondence to:* Saket Pande (s.pande@tudelft.nl)

The copyright of individual parts of the supplement might differ from the article licence.

1

2

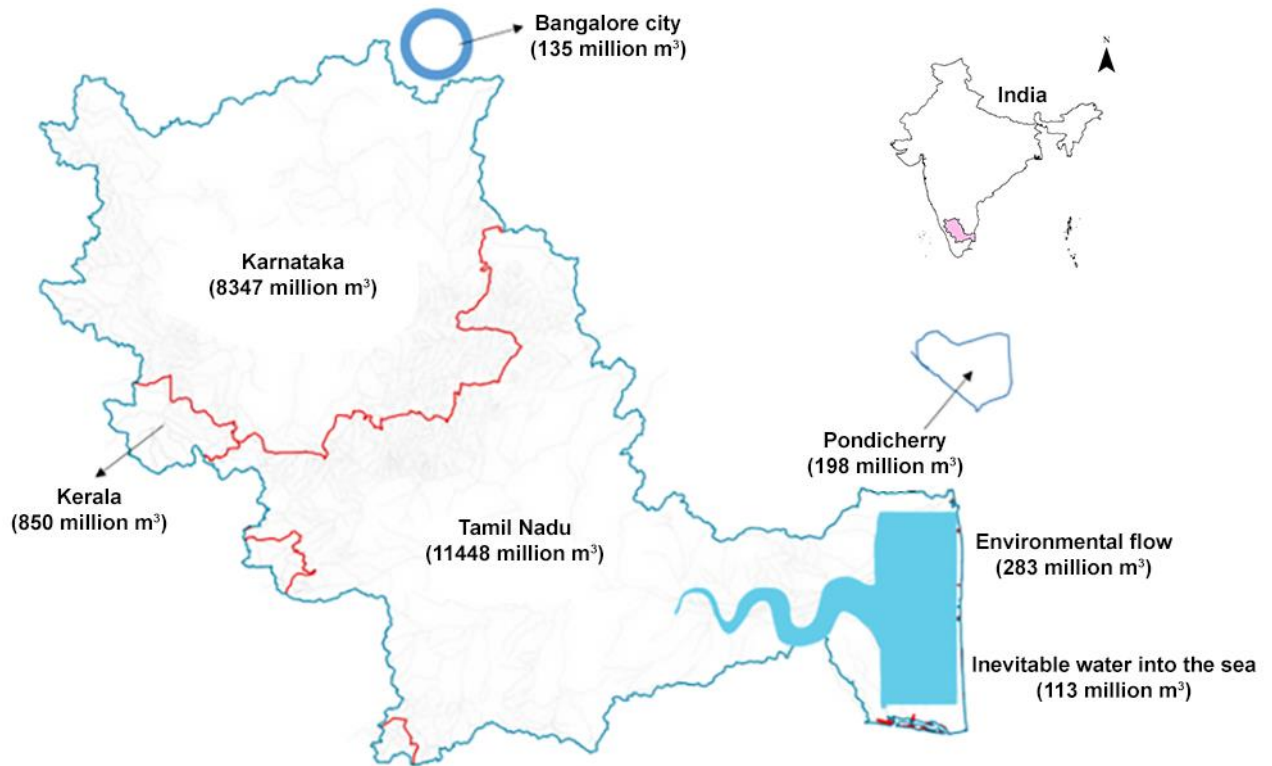

3

4

5 Figure S.1. Overview of water allocation (million m<sup>3</sup>/year) in the Cauvery basin among different states/union

6 territories as per the supreme court Verdict in 2018.

## Supplementary materials

### 7 **1. The model structures**

8 The FLEX-Topo model employs a graphical representation (Figure S.2) and a set of variables (Table S.1) to  
9 simulate hydrological processes in different landscape units known as hydrological response units (HRUs). These  
10 HRUs are classified based on elevation (DEM), slope, and Height Above Nearest Drainage (HAND). The model  
11 starts by dividing the landscape into Hillslope, Plateau, and Wetland regions, taking into account the land use  
12 patterns identified from maps.

13

14 Rainfall ( $P$ ) is partitioned into interception evaporation ( $E_i$ ) and effective rainfall ( $P_e$ ) based on a threshold value  
15 ( $S_i \max$ ). The effective rainfall is further divided between soil water retention and yield runoff ( $R$ ) using the root  
16 zone storage capacity ( $S_u, \max$ ) and a shape parameter ( $\beta$ ). Plant transpiration ( $E_t$ ) is calculated considering  
17 potential evaporation ( $E_0$ ), a soil moisture threshold parameter ( $C_e$ ), and the relative soil moisture ( $S_u/S_u, \max$ ).  
18 The generated runoff is then separated into fast ( $R_f$ ) and slow ( $R_s$ ) components using a separator ( $D$ ). A lag  
19 function is applied to represent the lag time ( $T$ ) between peak flow and the storm event. The fast and slow runoff  
20 components are modeled using two linear reservoirs with different time constants ( $K_f$  and  $K_s$ ). The total runoff  
21 ( $Q_m$ ) is the sum of these fast and slow components ( $Q_f$  and  $Q_s$ ).

22

23 The landscape classification affects the parameters of the unsaturated root zone reservoir ( $S_u, \max$ ) due to  
24 variations in rooting depth caused by topography and hydrology. The  $S_u, \max$  values for hillslope forest and  
25 plateau forest are comparatively larger than those for hillslope crops and plateau crops. In wetlands, the root zone  
26 storage capacity ( $S_u, \max, W$ ) is relatively low due to the shallow groundwater table.

27

28 Five HRUs are determined based on the percentage of landscape classes for the upstream and downstream areas  
29 of the reservoir for each sub-basin (Figure 5). These HRUs are connected to a common groundwater reservoir,  
30 recharged by different sources depending on the landscape unit (e.g., hillslope forest, hillslope crop, plateau forest,  
31 plateau crop, and capillary rise from wetlands).

32

33 During the calibration of the model, parameter ranges (Table S.1) are set by optimization to ensure accurate  
34 representation of the hydrological processes in the studied area, particularly the Cauvery basin, which is  
35 predominantly covered by field crops, plantation crops, and evergreen forests. However, the land use pattern has  
36 been significantly influenced by agricultural activities.

37 Table S.1. Model parameters prior ranges. These define the feasible range within which parameters are calibrated.

| Parameters                                                                 | Parameter Range  |                                                                                         |                   |                     |              |
|----------------------------------------------------------------------------|------------------|-----------------------------------------------------------------------------------------|-------------------|---------------------|--------------|
|                                                                            | Plateau<br>ucrop | Plateau<br>forest                                                                       | Hillslope<br>crop | Hillslope<br>forest | Wetland<br>s |
| $I_{\max}$ [mm/day]<br>(Storage capacity of the Interception<br>reservoir) | 1-8              | 6-10                                                                                    | 1-8               | 6-10                | 1-5          |
| $C_e$ [-]<br>(Fraction of $S_{u, \max}$ )                                  | 0.1-1            | 0.1-1                                                                                   | 0.1-1             | 0.1-1               | 0.1-1        |
| $S_{u, \max}$ [mm]<br>(Maximum soil moisture capacity in the<br>root zone) | 100-<br>500      | 100-1000                                                                                | 100-500           | 100-1000            | 10-100       |
| $\beta$ [-]<br>(Spatial heterogeneity in the<br>catchment/shape parameter) | 0.1-5            | 0.1-5                                                                                   | 0.1-5             | 0.1-5               | 0.1-5        |
| $P_{\max}$ [-]<br>(Maximum percolation rate)                               | 0.1-5            | 0.1-5                                                                                   | -                 | -                   | -            |
| $D$ [-]<br>(The splitter)                                                  | -                | -                                                                                       | 0-0.5             | 0-0.5               | -            |
| $C_{R, \max}$ [mm/day]<br>(Capillary rise)                                 | -                | -                                                                                       | -                 | -                   | 0.01-1       |
| $K_f$ [d]<br>(Recession coefficient of the fast reservoir)                 | 0.005 -<br>1     | 0.005 -1                                                                                | 0.005-1           | 0.005-1             | 0.005-1      |
| <b>Catchment parameters</b>                                                |                  |                                                                                         |                   |                     |              |
| $K_s$ [d]<br>(Recession coefficient of the slow<br>reservoir)              |                  |                                                                                         | 0.0001-0.01       |                     |              |
| $T_{\text{lag}}$ [d]<br>(Time lag between the storm and peak<br>flow)      |                  |                                                                                         | 0.1 – 30          |                     |              |
| Frac 1 [-]<br>(Fraction of forests cover)                                  |                  | The value is fixed (0 -1) based on the percentage of<br>forest area in the sub-basin    |                   |                     |              |
| Frac 2 [-]<br>(Fraction of Irrigation)                                     |                  | The value is fixed (0 -1) based on the percentage of<br>Irrigated area in the sub-basin |                   |                     |              |

38

39 Source Ekka et al., 2022

40

41

42

43

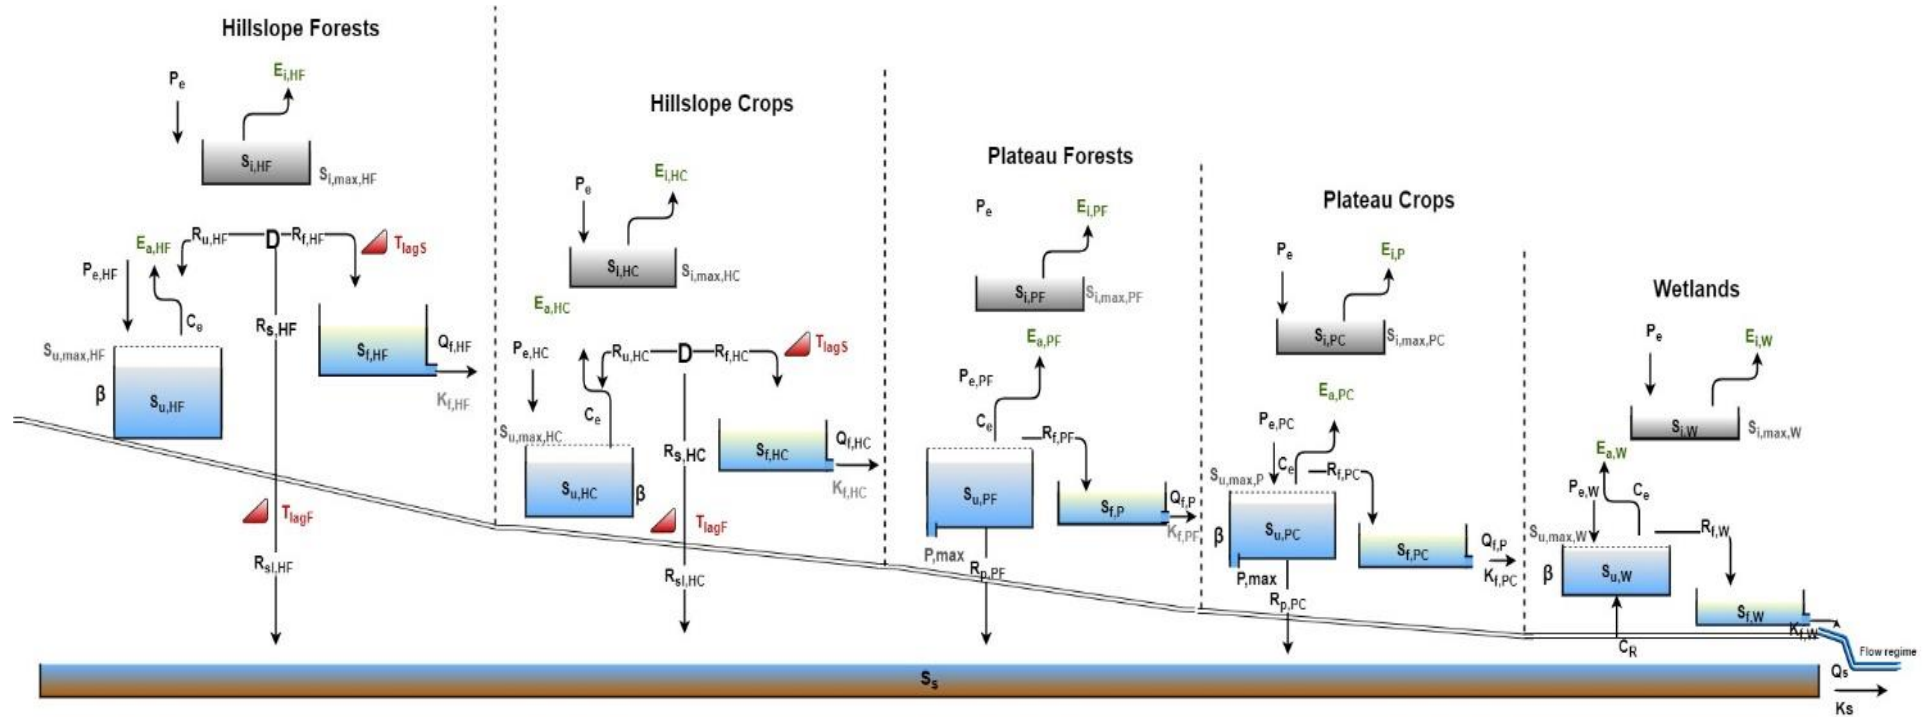

44

45

Figure S.2 The model structure; Source: Ekka et al., 2022

## 2. Calibration and validation of the integrated model

The Elitist Non-Dominated Sorting Genetic (NSGA-II) algorithm is used to calibrate the model parameters (Deb et al., 2000). NSGA-II is a multi-objective optimization algorithm. It simultaneously optimizes multiple objectives by identifying parameters that yield model performances that are not dominated by any other feasible parameters in the multi-objective space (Efstratiadis & Koutsoyiannis, 2010). In total 25 parameters were calibrated and are indicated in Table S. 1 The population size, number of generations, crossover and mutation probability were indicated in Table S.2.

The NSGA-II parameter setting may have different impacts on computational effectiveness. The population size, number of generations were indicated in Table 3. The population crossing over and population mutation play critical roles during optimization higher fraction of the population crossing over (0.9) and a lower value of mutation value are preferred for better convergence and to prevent the population from getting trapped in local optima (Wang et al., 2019). The population size depends on the number of the decision variables calibrated in the model and keeping the population size five times the number of decision variables is considered ideal for the simulation (Gutierrez et al., 2019). Since for Flex-Topo, there are 20 parameters, the population size is kept at 100. Similarly, for the reservoir model, the number of parameters is five, which translates into a population size of 25. Higher population sizes were also attempted but not used and reported for later analysis because the performance achieved was similar to the reported population sizes. The number of iterations is first tested using 50, 100, 250 and 500 iteration runs and 250 was finally chosen based on the best optimization results.

Table S.2. Parameter setting for NSGA II optimization of the model

| <b>NSGA parameters</b>    | <b>Reservoir calibration</b> | <b>Integrated FLEX-Topo Calibration</b> |
|---------------------------|------------------------------|-----------------------------------------|
| No. of Iterations         | 250                          | 300                                     |
| No. of decision variables | 5-8                          | 25                                      |
| No. of population size    | 25-40                        | 125                                     |
| Population Crossover      | 0.7                          | 0.7                                     |
| Mutation probabilities    | 0.2                          | 0.2                                     |
| New generation selection  | Elitist selection            | Elitist selection                       |
| Ordering criteria         | Crowding distance            | Crowding distance                       |

Source: Ekka et al., 2022

The reservoir calibration was conducted on a daily time scale, using all available years of data due to limited reservoir data. Negative NSE values are reported instead of positive NSE (due to its use to maximize as an objective in NSGA II). NSE values are greater than 0.5 and sometimes even around 0.7, which indicates reasonably good performance of a model at daily scale that also incorporated reservoir operations. In the current model, the negative reverse of NSE value is used to calibrate and validate the model parameters.

The calibration results, presented in Table S.3, were obtained using the NSGA II algorithm, and the Pareto front ranges for both -NSE and MAE are shown within parentheses. The MAE values, which indicate the accuracy of predictions, range from 0.71 to 2.92 (106 m<sup>3</sup> day<sup>-1</sup>), falling within an acceptable range. Lower MAE values indicate better predictions. Similarly, the NSE values, which assess the model's goodness of fit, range from 0.51

## Supplementary materials

to 0.73, all above the acceptable threshold of 0.50. It is important to note that the calibration and validation of the reservoir models did not include validation against observed streamflow at the reservoir outlets. Despite this limitation, the overall MAE and NSE values indicate acceptable performance for the reservoir models, given the available data and operational considerations

Table S.3. The model performance metrics for the calibration of the four reservoirs and the calibration and validation of the Flex-Topo models (i.e., the integration of calibrated reservoirs with upstream and downstream FLEX-Topo models) for the corresponding four sub-basins.

| <b>Reservoir Calibration (2011-2016)</b>          |                                |                                              |                      |                               |                                      |                      |
|---------------------------------------------------|--------------------------------|----------------------------------------------|----------------------|-------------------------------|--------------------------------------|----------------------|
| <b>Reservoirs</b>                                 | <b>-NSE [range]</b>            | <b>MAE [range] 5<br/>fff</b>                 |                      |                               |                                      |                      |
| Harangi(kudige)                                   | -0.64 [-0.65 - (-0.63)]        | 2.92 [ 2.92 -3.01]                           |                      |                               |                                      |                      |
| Hemavathi (M.H. Halli)                            | -0.51 [-0.52 - (-0.51)]        | 1.15 [1.15 -1.16]                            |                      |                               |                                      |                      |
| Kabini (T. Narasipur)                             | -0.73 [-0.73 - (-0.72)]        | 1.24 [ 1.24-1.24]                            |                      |                               |                                      |                      |
| KRS(Kollegal)                                     | -0.68 [-0.67 - (-0.69)]        | 0.71 [0.70 - 0.72]                           |                      |                               |                                      |                      |
| <b>Flex-Topo model calibration and validation</b> |                                |                                              |                      |                               |                                      |                      |
| <b>Sub-basins</b>                                 | <b>Calibration (1991-2010)</b> |                                              |                      | <b>Validation (2011-2016)</b> |                                      |                      |
|                                                   | <b>-NSE [range]</b>            | <b>MAE [range]<br/>(mm day<sup>-1</sup>)</b> | <b>PBIAS<br/>(%)</b> | <b>-NSE</b>                   | <b>MAE<br/>(mm day<sup>-1</sup>)</b> | <b>PBIAS<br/>(%)</b> |
| Kudige                                            | -0.80 [-0.81 - (-0.80)]        | 1.36 [1.33 -1.39]                            | 8.54                 | -0.65                         | 2.05                                 | 16.27                |
| M.H. Halli                                        | -0.57 [-0.57 - (-0.56)]        | 0.37 [0.40 -0.41]                            | 3.24                 | -0.52                         | 0.48                                 | 17.66                |
| T.Narasipur                                       | -0.53 [-0.53 - (-0.50)]        | 0.67 [0.67- 0.69]                            | 11.62                | -0.52                         | 0.66                                 | -42.80               |
| Kollegal                                          | -0.53 [-0.54 - (-0.52)]        | 0.92 [0.92 -0.97]                            | -6.23                | -0.50                         | 0.86                                 | -57.54               |

**Note** - The value indicates the best-performing parameters following the minimum Euclidean distance. The figures in parenthesis indicate the pareto-optimal range of all solutions considered feasible.  $PBIAS = 100 \sum_{i=1}^n (Q_i^o - Q_i^m) / \sum_{i=1}^n Q_i^o$  is provided only for the Flex-Topo model to evaluate its performance for the four sub-basins.

Source Ekka et al., 2022

Table S.3 presents the performance evaluation of the calibrated Flex-Topo model compared to observed data for the four sub-basins. During the calibration phase, the Nash-Sutcliffe Efficiency (NSE) values ranged from 0.53 to 0.80, and during the validation phase, they were between 0.50 to 0.65 for all sub-basins. NSE values above 0.50 are considered acceptable, indicating a satisfactory level of model performance. Additionally, the Mean Absolute Error (MAE) values during calibration ranged from 0.92 to 1.36 mm day<sup>-1</sup>, and during validation, they fell between 0.86 to 2.05 mm day<sup>-1</sup>, also deemed acceptable.

The Percentage Bias (PBIAS) values for both calibration and validation periods are provided in Table 5. For Kudige and M.H. Halli sub-basins, the PBIAS values are within the acceptable range of  $\pm 25$  percent. However, for T. Narasipur and Kollegal sub-basins, the PBIAS values during the validation period exceed the acceptable limits.

The positive PBIAS values indicate that the model performs better in simulating low flows compared to high flows. This observation is supported by Figure 8, where high flows are often underpredicted, particularly for Harangi, Hemavathi, and Kabini reservoirs. The parameter sets chosen for the simulations are from the Pareto front and may not represent the best possible performances in either of the two objective functions (NSE and

## Supplementary materials

MAE). While NSE is sensitive to high flows as it is a quadratic function of residuals, MAE is more robust to outliers. This robustness of MAE might explain why high flows are not as well simulated as low flows in the model. (Pande, 2013 a, b) discusses these characteristics of the model's performance evaluation metrics.

**Table S.4 Definitions of major Indicators of hydrological alterations**

| <b>Flow characteristics</b>   | <b>Indicators of Hydrologic Alteration (IHA)</b> | <b>Definitions (for non-parametric)</b>                                                                |
|-------------------------------|--------------------------------------------------|--------------------------------------------------------------------------------------------------------|
| Magnitude/ timing             | The median value for each calendar month         | Median ( $m^3s^{-1}$ ) of daily flow condition from January to December                                |
| Magnitude/ duration           | Annual minima, 1-day median                      | Minimum flow value ( $m^3s^{-1}$ ) occurred in a year                                                  |
|                               | Annual minima, 3-day median                      | Minimum flow value ( $m^3s^{-1}$ ) for the mean daily flow of 3 consecutive days of the year           |
|                               | Annual minima, 7-day median                      | Minimum flow value ( $m^3s^{-1}$ ) for the mean daily flow of 7 consecutive days of the year           |
|                               | Annual minima, 30-day median                     | Minimum flow value ( $m^3s^{-1}$ ) for the mean daily flow of 30 consecutive days of the year          |
|                               | Annual minima, 90-day median                     | Minimum flow value ( $m^3s^{-1}$ ) for the mean daily flow of 90 consecutive days of the year          |
|                               | Annual maxima, 1-day median                      | Maximum flow value ( $m^3s^{-1}$ ) occurred in a year                                                  |
|                               | Annual maxima, 3-day median                      | Maximum flow value ( $m^3s^{-1}$ ) for the mean daily flow of 3 consecutive days of the year           |
|                               | Annual maxima, 7-day median                      | Maximum flow value ( $m^3s^{-1}$ ) for the mean daily flow of 7 consecutive days of the year           |
|                               | Annual maxima, 30-day median                     | Maximum flow value ( $m^3s^{-1}$ ) for the mean daily flow of 30 consecutive days of the year          |
|                               | Annual maxima, 90-day median                     | Maximum flow value ( $m^3s^{-1}$ ) for the mean daily flow of 90 consecutive days of the year          |
| Duration                      | Low pulse count (days)                           | No of times in a year when the flow is lower than the 25 % percentile of the flow period               |
|                               | High pulse count (days)                          | No. of times in a year when the flow is higher than the 75 % percentile of the flow period in analysis |
|                               | Low pulse duration (days):                       | The median duration of the low pulses (days)                                                           |
|                               | High pulse duration (days):                      | The median duration of the high pulses (days)                                                          |
| Environmental flow components | Extreme low peak                                 | Minimum flow event during each water year or season                                                    |
|                               | Extreme low frequency                            | Frequency of extreme low flows during each water year or season                                        |

References: compiled from The Nature Conservancy (TMC), 2009

Table S.4. The residence time of the reservoirs

| <b>Reservoir</b>                 | <b>Year of construction</b> | <b>Sub-basin based on gauge location</b> | <b>Catchment area (<math>10^6 m^2</math>)</b> | <b>Gross Storage (<math>10^6 m^3</math>)</b> | <b>Residence time (months)</b> |
|----------------------------------|-----------------------------|------------------------------------------|-----------------------------------------------|----------------------------------------------|--------------------------------|
| <b>Harangi</b>                   | 1982                        | Kudige                                   | 419.58                                        | 240.69                                       | 7.23                           |
| <b>Hemavathi</b>                 | 1979                        | M.H. Halli                               | 2810                                          | 1050.63                                      | 22.63                          |
| <b>Krishna Raja Sagara (KRS)</b> | 1938                        | Kollegal                                 | 10619                                         | 1400.31                                      | 8.68                           |
| <b>Kabini</b>                    | 1974                        | T. Narasipur                             | 2141.90                                       | 552.74                                       | 3.57                           |



Supplementary materials

Table S.5 The Crop coefficient (Kc) and yield response factor (Ky) used to calculate the yield

| Crops                                         | Kc   | Ky   |                                                                  |      |      |
|-----------------------------------------------|------|------|------------------------------------------------------------------|------|------|
| <b>1 CEREAL CROPS</b>                         |      |      | Mango                                                            | 0.69 | 1.10 |
| Bajra                                         | 0.67 | 0.92 | Papaya                                                           | 0.93 | 0.90 |
| Jowar                                         | 0.69 | 0.92 | Pomogranate                                                      | 0.5  | 0.90 |
| Maize                                         | 1.06 | 1.25 | Potato                                                           | 1.09 | 1.10 |
| Paddy                                         | 1.14 | 1.20 | Sapota                                                           | 0.7  | 0.90 |
| Ragi                                          | 0.69 | 0.90 | Sweetpotato                                                      | 1.09 | 1.00 |
| <b>2 PULSES CROPS</b>                         |      |      | Tapioca                                                          | 1.09 | 0.80 |
| Avare                                         | 0.74 | 0.85 | Coffee (Arabica)                                                 |      |      |
| Bengal gram (Gram)                            | 0.90 | 0.90 | Coffee (Robusta)                                                 |      |      |
| Black gram                                    | 0.65 | 0.85 | <b>6 CONDIMENTS &amp; SPICES CROPS</b>                           |      |      |
| Cowpea                                        | 1.19 | 0.98 | Coriandar                                                        | 1.19 | 1.20 |
| Green gram                                    | 0.89 | 0.80 | Arecanut (Raw & Processed Nuts)                                  | 0.8  | 0.90 |
| Horse gram                                    | 0.74 | 0.90 | Black pepper                                                     | 1.19 | 1.10 |
| Navane                                        | 0.74 | 0.70 | Cardamom                                                         | 1.19 | 1.10 |
| Tur (Red gram)                                | 0.74 | 0.90 | Dry Chillies                                                     | 0.95 | 1.10 |
| <b>3 OIL SEEDS CROPS</b>                      |      |      | Dry Ginger                                                       | 0.93 | 1.10 |
| Linseed                                       | 0.78 | 0.70 | Garlic                                                           | 1.19 | 0.90 |
| Castor                                        | 0.7  | 0.70 | Turmeric                                                         | 1.01 | 0.85 |
| Groundnut                                     | 0.78 | 0.70 | Source: Compiled from Allen et al., 1998; Mohan & Arumugam.,1994 |      |      |
| Niger seed                                    | 0.7  | 0.80 |                                                                  |      |      |
| Rape & Mustard                                | 0.75 | 0.80 |                                                                  |      |      |
| Safflower                                     | 0.75 | 0.80 |                                                                  |      |      |
| Sesamum                                       | 0.75 | 0.95 |                                                                  |      |      |
| Soyabean                                      | 0.70 | 0.85 |                                                                  |      |      |
| Sunflower                                     | 0.75 | 0.95 |                                                                  |      |      |
| <b>4 COMMERCIAL / FIBRE CROPS</b>             |      |      |                                                                  |      |      |
| Cotton                                        | 0.88 | 0.85 |                                                                  |      |      |
| Sugarcane                                     | 1.58 | 1.20 |                                                                  |      |      |
| Tobacco                                       | 0.9  | 1.10 |                                                                  |      |      |
| Crops                                         | Kc   | Ky   |                                                                  |      |      |
| <b>5 PLANTATION &amp; HORTICULTURAL CROPS</b> |      |      |                                                                  |      |      |
| Lemon                                         | 0.7  | 1.10 |                                                                  |      |      |
| Onion                                         | 1.19 | 1.10 |                                                                  |      |      |
| Tomato                                        | 1.19 | 1.05 |                                                                  |      |      |
| Banana                                        | 1.12 | 1.20 |                                                                  |      |      |
| Beans                                         | 0.93 | 1.15 |                                                                  |      |      |
| Brinjal                                       | 0.93 | 0.85 |                                                                  |      |      |
| Cabbage                                       | 1.19 | 0.85 |                                                                  |      |      |
| Cashewnut (Raw&Processed Nuts)                | 0.8  | 0.90 |                                                                  |      |      |
| Coconut                                       | 0.8  | 0.90 |                                                                  |      |      |
| Grapes                                        | 0.85 | 1.10 |                                                                  |      |      |
| Guava                                         | 0.69 | 1.10 |                                                                  |      |      |

Supplementary materials

**Table S.6 An overview of the irrigated and non-irrigated areas for each district under respective reservoirs**

| Reservoirs | Kodagu (ha)               |                           |             | Mysore (ha)               |                           |             | Hassan (ha)               |                               |             | Chikmagalur (ha)          |                           |             |
|------------|---------------------------|---------------------------|-------------|---------------------------|---------------------------|-------------|---------------------------|-------------------------------|-------------|---------------------------|---------------------------|-------------|
|            | Irrigated (with in basin) | Irrigated (Outside basin) | Unirrigated | Irrigated (with in basin) | Irrigated (Outside basin) | Unirrigated | Irrigated (with in basin) | Irrigated (Outside the basin) | Unirrigated | Irrigated (with in basin) | Irrigated (Outside basin) | Unirrigated |
| Harangi    | 2,792                     | 0.00                      | 79,808      | 14,482                    | 27,329                    | 0.00        | 0.00                      | 8,935                         | 0.00        | 0.00                      | 0.00                      | 0.00        |
| Hemavathi  | 1,060                     | 0.00                      | 17,661      | 0.00                      | 2,267                     | 0.00        | 69,223                    | 0.00                          | 82,028      | 0.00                      | 0.00                      | 75,937      |
| Kabini     | 0.00                      | 0.00                      | 15,461      | 23,028                    | 0.00                      | 133,799     | 0.00                      | 0.00                          | 0.00        | 0.00                      | 0.00                      | 0.00        |
| KRS        | 0.00                      | 0.00                      | 55,919      | 34,673                    | 0.00                      | 124,432     | 0.00                      | 0.00                          | 268,041     | 0.00                      | 0.00                      | 0.00        |

| Reservoirs | Chamrajanagar (ha)            |                               |             | Mandya (ha)               |                               |             | Tumkur (ha)               |                           |             | Wayanad (ha)                  |                               |             |
|------------|-------------------------------|-------------------------------|-------------|---------------------------|-------------------------------|-------------|---------------------------|---------------------------|-------------|-------------------------------|-------------------------------|-------------|
|            | Irrigated (with in sub-basin) | Irrigated (Outside sub-basin) | Unirrigated | Irrigated (with in basin) | Irrigated (Outside the basin) | Unirrigated | Irrigated (with in basin) | Irrigated (Outside basin) | Unirrigated | Irrigated (with in sub-basin) | Irrigated (Outside sub-basin) | Unirrigated |
| Harangi    | 0.00                          | 0.00                          | 0.00        | 0.00                      | 0.00                          | 0.00        | 0.00                      | 0.00                      | 0.00        | 0.00                          | 0.00                          | 0.00        |
| Hemavathi  | 0.00                          | 0.00                          | 0.00        | 0.00                      | 92,239                        | 0.00        | 0.00                      | 127,076                   | 0.00        | 0.00                          | 0.00                          | 0.00        |
| Kabini     | 22,702                        | 0.00                          | 103,389     | 0.00                      | 0.00                          | 226         | 0.00                      | 0.00                      | 0.00        | 0.00                          | 0.00                          | 98,641      |
| KRS        | 73,409                        | 0.00                          | 72,243      | 0.00                      | 0.00                          | 207,379     | 0.00                      | 0.00                      | 0.00        | 0.00                          | 0.00                          | 0.00        |

| Reservoirs | Erode (ha)                |                               |             | The Nilgiris (ha)         |                               |             |
|------------|---------------------------|-------------------------------|-------------|---------------------------|-------------------------------|-------------|
|            | Irrigated (with in basin) | Irrigated (Outside the basin) | Unirrigated | Irrigated (with in basin) | Irrigated (Outside the basin) | Unirrigated |
| Harangi    | 0.00                      | 0.00                          | 0.00        | 0.00                      | 0.00                          | 0.00        |
| Hemavathi  | 0.00                      | 0.00                          | 0.00        | 0.00                      | 0.00                          | 0.00        |
| Kabini     | 0.00                      | 0.00                          | 0.00        | 0.00                      | 0.00                          | 22,711      |
| KRS        | 0.00                      | 0.00                          | 54,349      | 0.00                      | 0.00                          | 0.00        |

Supplementary materials

Table S.7 Average yearly price of crops used to calculate the economic value of the agricultural production. (2011 to 2016)

|   | CROPS                  | District     |               |        |        |        |        |         |       |          |        |
|---|------------------------|--------------|---------------|--------|--------|--------|--------|---------|-------|----------|--------|
|   |                        | Chikamagalur | Chamrajanagar | Hassan | Kodagu | Mandya | Mysore | Wayanad | Erode | Nilgiris | Tumkur |
| 1 | <b>CEREAL CROPS</b>    |              |               |        |        |        |        |         |       |          |        |
|   | Bajra                  | -            | 886           | -      | -      | -      | -      | -       | -     | -        | -      |
|   | Jowar                  | 938          | 887           | 938    |        | 943    | 834    | -       | -     | -        | -      |
|   | Maize                  | 900          | 875           | 900    | 893    | 926    | 822    | -       | 926   | -        | -      |
|   | Minor Millets          | 1,560        | -             | 1,560  | -      | -      | -      | -       | -     | -        | -      |
|   | Paddy                  | 946          | 979           | 946    | 988    | 984    | 953    | 983     | 984   | 984      | 946    |
|   | Ragi                   | 939          | 948           | 939    | 951    | 989    | 903    | -       | 989   | -        | -      |
| 2 | <b>PULSES CROPS</b>    |              |               |        |        |        |        |         |       |          |        |
|   | Avare                  | 2,550        | 2,235         | 2,550  | -      | 2,457  | 2,433  | -       | -     | 2,457    | 2,550  |
|   | Bengal gram (Gram)     | 2,626        | 4,394         | 2,626  | -      | 3,533  | 3,238  | -       | 3,533 | -        | 2,626  |
|   | Black gram             | 4,985        | 3,874         | 4,985  | -      | 5,473  | 4,420  | -       | 5,473 | 5,473    | 4,985  |
|   | Cowpea                 | 2,337        | 2,252         | 2,337  | 2,689  | 2,607  | 3,536  | -       | 2,607 | 2,607    | 2,337  |
|   | Green gram             | 3,486        | 3,967         | 3,486  | -      | 4,129  | 4,239  | -       | 4,129 | 4,129    | 3,486  |
|   | Horse gram             | 1,601        | 1,667         | 1,601  | -      | 1,560  | 1,665  | -       | 1,560 | 1,560    | 1,601  |
|   | Tur (Red gram)         | 4,496        | 4,387         | 4,496  | -      | 3,974  | -      | -       | -     | 3,974    | 4,496  |
| 3 | <b>OIL SEEDS CROPS</b> |              |               |        |        |        |        |         |       |          |        |
|   | Linseed                | 2,570        | -             | -      | -      | -      | -      | -       | -     | -        | -      |
|   | Castor                 | 2,564        | 2,521         | 2,570  |        | 3,974  | 2,605  | -       | -     | -        | -      |

Supplementary materials

|   |                                             |       |       |       |       |       |       |       |       |       |       |
|---|---------------------------------------------|-------|-------|-------|-------|-------|-------|-------|-------|-------|-------|
|   | Groundnut                                   | 3,336 | 1,497 | 2,564 | 2,717 | 2,131 | 2,352 | -     | 2,131 | -     | 2,564 |
|   | Niger seed                                  | 4,466 | 3,432 | 3,336 | -     | 3,094 | 2,854 | -     | -     | -     | -     |
|   | Rape & Mustard                              | 2,703 | 4,466 | 4,466 | -     | -     | -     | -     | -     | -     | -     |
|   | Safflower                                   | 3,994 | 3,384 | 2,703 | -     | -     | -     | -     | -     | -     | -     |
|   | Sesamum                                     | 3,994 | 2,368 | 3,994 | -     | 4,466 | 4,258 | -     | -     | -     | -     |
|   | Soyabean                                    | -     | -     | -     | -     | -     | -     | -     | -     | -     | -     |
|   | Sunflower                                   | 2,429 | -     | 2,429 | -     | 2,476 | 2,676 | -     | -     | -     | -     |
|   | <b>COMMERCIAL / FIBRE CROPS</b>             |       |       |       |       |       |       |       |       |       |       |
| 4 | Cotton                                      | 3,691 | 2,806 | 3,691 | -     | -     | 2,980 | -     | -     | -     | 3,691 |
|   | Sugarcane                                   | 930   | 930   | 930   | -     | -     | 920   | -     | -     | -     | 930   |
|   | Tobacco                                     | 2,684 | 2,684 | 2,684 | 2,684 | -     | 2,557 | -     | -     | -     | 2,684 |
|   | <b>PLANTATION &amp; HORTICULTURAL CROPS</b> |       |       |       |       |       |       |       |       |       |       |
| 5 | Lemon                                       | 3,017 | 3,017 | 3,017 | -     | 3,017 | 2,884 | -     | -     | -     | 3,017 |
|   | Onion                                       | 870   | 923   | 923   | -     | 890   | 928   | -     | -     | 890   | 870   |
|   | Tomato                                      | 677   | 614   | 939   | 561   | 561   | 545   | -     | -     | 561   | 677   |
|   | Banana                                      | 1,691 | 1,691 | 1,691 | 1,691 | 1,691 | 1,510 | 1,646 | -     | -     | 1,691 |
|   | Beans                                       | 1,391 | 1,391 | 1,309 | 1,310 | 1,310 | 1,534 | -     | -     | 1,310 | 1,391 |
|   | Brinjal                                     | 740   | 748   | 747   | 748   | 748   | 638   | -     | -     | 748   | 740   |
|   | Cabbage                                     | 406   | 406   | 406   | 406   | 408   | 375   | -     | -     | -     | 406   |

## Supplementary materials

|                                  |        |       |        |        |       |       |        |     |   |       |
|----------------------------------|--------|-------|--------|--------|-------|-------|--------|-----|---|-------|
| Cashewnut (Raw & Processed Nuts) | 4,668  | 4,668 | 4,668  | 4,668  | 4,348 | 4,098 | 4,098  | -   | - | 4,668 |
| Coconut                          | 4,466  | 4,466 | 4,466  | 4,466  | 4,466 | 4,352 | 4,352  | -   | - | 4,466 |
| Grapes                           | 1,739  | 1,739 | 1,739  | -      | -     | 1,619 | -      | -   | - | 1,739 |
| Guava                            | 585    | 585   | 585    | 585    | 585   | 552   | -      | -   | - | 585   |
| Mango                            | 671    | 671   | 671    | 671    | 671   | 634   | -      | 671 | - | 671   |
| Papaya                           | 726    | 726   | 726    | 726    | 726   | 714   | -      | -   | - | 726   |
| Pomogranate                      | 7,443  | 7,443 | 7,443  |        | 7,443 | 7,224 | -      | -   | - | 7,443 |
| Potato                           | 883    | 639   | 799    | 800    | 800   | 955   | -      | -   | - | 883   |
| Sapota                           | 1,493  | 1,493 | 1,493  | 1,493  | 1,493 | 1,409 | -      | -   | - | 1,493 |
| Sweet potato                     | 451    | 568   | 568    | 568    | 275   | 552   | -      | -   | - | 451   |
| Tapioca                          | 807    | 807   | -      | 807    | -     | 777   | 721    | -   | - | 807   |
| Coffee (Arabica)                 | 11,997 | -     | 14,250 | 14,304 | -     | -     | 14,304 | -   | - | -     |
| Coffee (Robusta)                 | 8,209  | -     | 9,982  | 6,772  | -     | -     | 6,772  | -   | - | -     |

### CONDIMENTS & SPICES CROPS

6

|                                 |        |        |        |        |       |        |        |   |   |        |
|---------------------------------|--------|--------|--------|--------|-------|--------|--------|---|---|--------|
| Coriandar                       | 4,558  | 4,558  | 4,558  | -      | 4,558 | 4,351  | -      | - | - | 4,558  |
| Arecanut (Raw & Processed Nuts) | 13,331 | 9,344  | 9,344  | 9,344  | 9,344 | 13,877 | 12,942 | - | - | 13,331 |
| Black Pepper                    | 21,846 | 20,785 | 20,785 | 19,542 | -     | 18,152 | 23,284 | - | - | 21,846 |
| Cardamom                        | 73,692 | 73,692 | 73,692 | 73,692 | -     | 73,548 | 73,548 | - | - | 73,692 |
| Dry Chillies                    | 4,388  | 4,339  | 4,339  | 4,339  | 5,395 | 4,938  |        | - | - | 4,388  |

Supplementary materials

|            |       |       |       |       |       |       |       |   |   |       |
|------------|-------|-------|-------|-------|-------|-------|-------|---|---|-------|
| Dry Ginger | 3,525 | 1,669 | 3,525 | 3,525 | 3,525 | 3,275 | 7,294 | - | - | 3,525 |
| Garlic     |       | 3,311 | 3,311 |       |       | 3,146 |       | - | - | 4,460 |
| Turmeric   | 4,460 | 4,765 | 4,460 | 4,460 | 4,460 | 3,803 | 3,803 | - | - | -     |

---

Source: Extracted and compiled from <https://agmarknet.gov.in/>.
